# Supplementary material for: High-performance (Al0.4Ga0.6)2O3/Al0.32Ga0.68N-based UVC/UVB tunable dual-band photodetectors
Source: Royal Society of Chemistry journal article supplement (doi:10.1039/d3ce01297b), 2024-01-01
Supplement: d3ce01297b1.pdf [file d3ce01297b1.pdf]

## Supplementary information

### High-performance $(\text{Al}_{0.4}\text{Ga}_{0.6})_2\text{O}_3/\text{Al}_{0.32}\text{Ga}_{0.68}\text{N}$ -based UVC/UVB tunable dual-band photodetector

Siyu Wu <sup>a</sup>, Zhengyuan Wu <sup>a,b</sup>, Pengfei Tian <sup>a</sup>, Jason Hoo <sup>c</sup>, Shiping Guo <sup>c</sup>, and Zhilai Fang <sup>a,b,\*</sup>

<sup>a</sup> Academy for Engineering and Technology, and School of Information Science and Technology, Fudan University, Shanghai 200433, China

<sup>b</sup> Institute of Optoelectronics, Fudan University, Shanghai 200433, China

<sup>c</sup> Advanced Micro-Fabrication Equipment Inc., 188 Taihua Road, Shanghai 201201, China

\* E-mail address: [zlfang@fudan.edu.cn](mailto:zlfang@fudan.edu.cn)

---

\* Corresponding author.

E-mail address: [zlfang@fudan.edu.cn](mailto:zlfang@fudan.edu.cn)

## Contents

1. Demonstration of AlGaN films
2. Spectral responsivity of the photodetectors based on AlGaN films
3. Schematic energy band diagrams of the dual-band PDs based on  $(\text{Al}_x\text{Ga}_{1-x})_2\text{O}_3/\text{AlGaN}$  heterojunction
4. Noise characteristics of the  $(\text{Al}_{0.4}\text{Ga}_{0.6})_2\text{O}_3/\text{Al}_{0.32}\text{Ga}_{0.68}\text{N}$  film-based PDs

## 1. Demonstration of AlGaN films

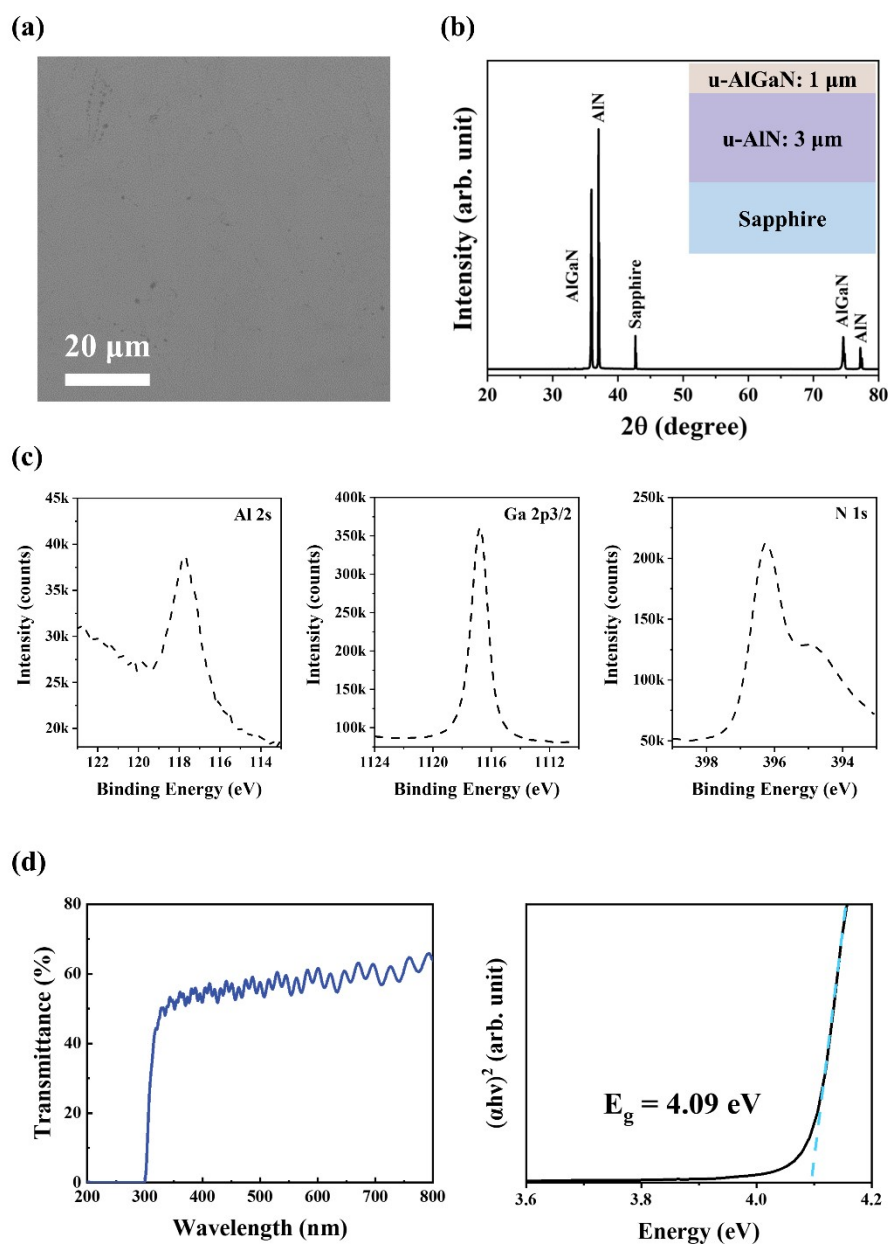

**Fig. S1** (a) Surface morphology of the AlGaN films. (b) XRD pattern of the AlGaN films with the structural schematic diagram of the samples shown in the inset. (c) XPS core-level spectra of Al 2s, Ga 2p<sub>3/2</sub>, and N 1s photoelectron peaks of the AlGaN films. (d) Transmission spectrum of the AlGaN films and corresponding Tauc plot.

The stoichiometric information of AlGaN films is identified as Al<sub>0.32</sub>Ga<sub>0.68</sub>N, and the bandgap is calculated to be 4.09 eV.

## 2. Spectral responsivity of the photodetectors based on AlGaN films

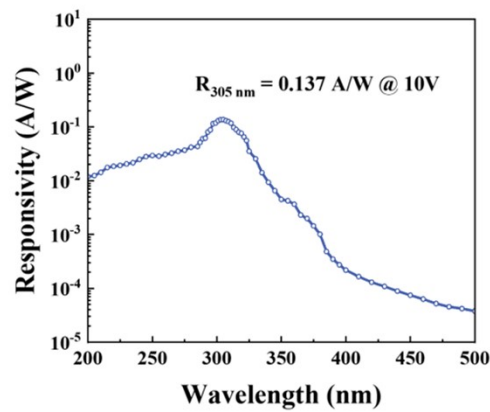

**Fig. S2** Spectral responsivity of the PDs based on  $\text{Al}_{0.32}\text{Ga}_{0.68}\text{N}$  films at 10 V bias.

PDs based on pristine  $\text{Al}_{0.32}\text{Ga}_{0.68}\text{N}$  film with the same MSM structure have been fabricated, and the spectral responsivities at 10 V bias are measured as a control in order to investigate the origin of the UVB response. At 10 V bias, the spectral response of the PDs shows a responsivity peak of 137 mA/W at 305 nm.

### 3. Schematic energy band diagrams of the dual-band PDs based on $(\text{Al}_x\text{Ga}_{1-x})_2\text{O}_3/\text{AlGaIn}$ heterojunction

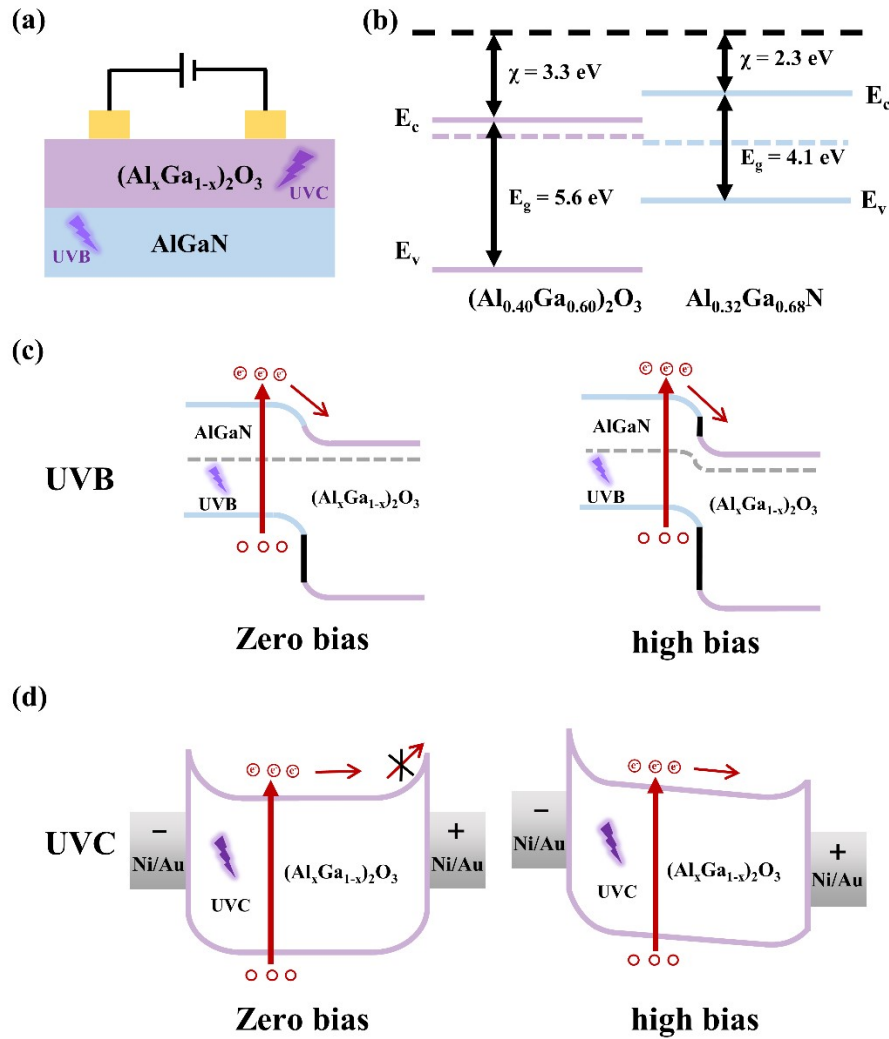

**Fig. S3** (a) Schematic diagram of dual-band photodetection model. The schematic energy band diagrams of the PDs based on  $(\text{Al}_x\text{Ga}_{1-x})_2\text{O}_3/\text{AlGaIn}$  heterojunction: (b) before contact, (c) UVB response and (d) UVC response at 0 V and a high bias.

The band alignments of  $(\text{Al}_{0.4}\text{Ga}_{0.6})_2\text{O}_3/\text{Al}_{0.32}\text{Ga}_{0.68}\text{N}$  with respect to vacuum level were obtained from previous reports [*Appl. Phys. Lett.*, 2001, **78**, 2503-2505; *AIP Adv.*, 2020, **10**, 125321], XPS and optical transmission spectroscopy analysis, exhibiting a type II band alignment. Fig. S3 demonstrates the possible mechanism of dual-band response based on our  $(\text{Al}_{0.4}\text{Ga}_{0.6})_2\text{O}_3/\text{Al}_{0.32}\text{Ga}_{0.68}\text{N}$  heterojunction.

#### 4. Noise characteristics of the $(\text{Al}_{0.4}\text{Ga}_{0.6})_2\text{O}_3/\text{Al}_{0.32}\text{Ga}_{0.68}\text{N}$ film-based PDs

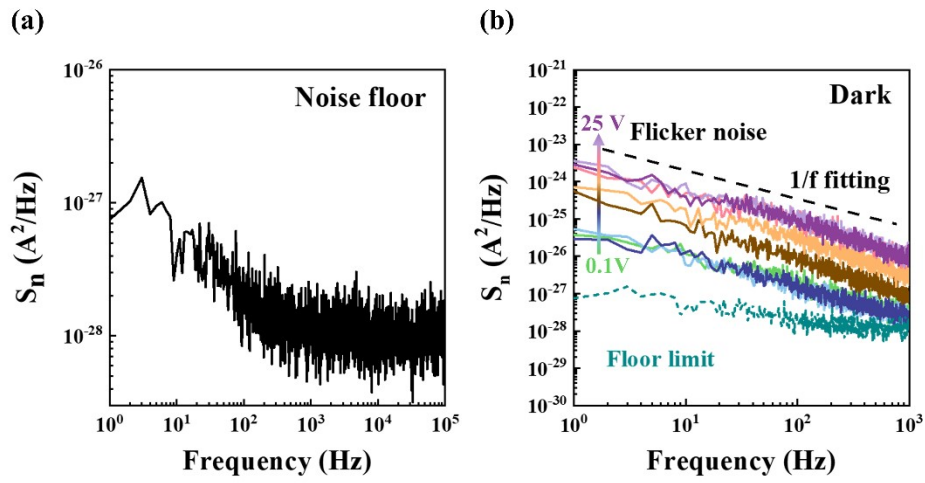

**Fig. S4** (a) Instrument noise floor of the  $(\text{Al}_{0.4}\text{Ga}_{0.6})_2\text{O}_3/\text{Al}_{0.32}\text{Ga}_{0.68}\text{N}$  film-based PDs. (b) Frequency-dependent noise power density at various bias voltages under dark condition.

It could be found that the noise power density spectrum can be well fitted with  $1/f$  function, indicating the dominant noise source is the flicker noise in the PDs.
